# Supplementary figures and images for: Design of permeability-optimized target-binding macrocycles via direct preference optimization
Source: Royal Society of Chemistry journal article supplement (doi:10.1039/d6sc01722c), 2026-04-09

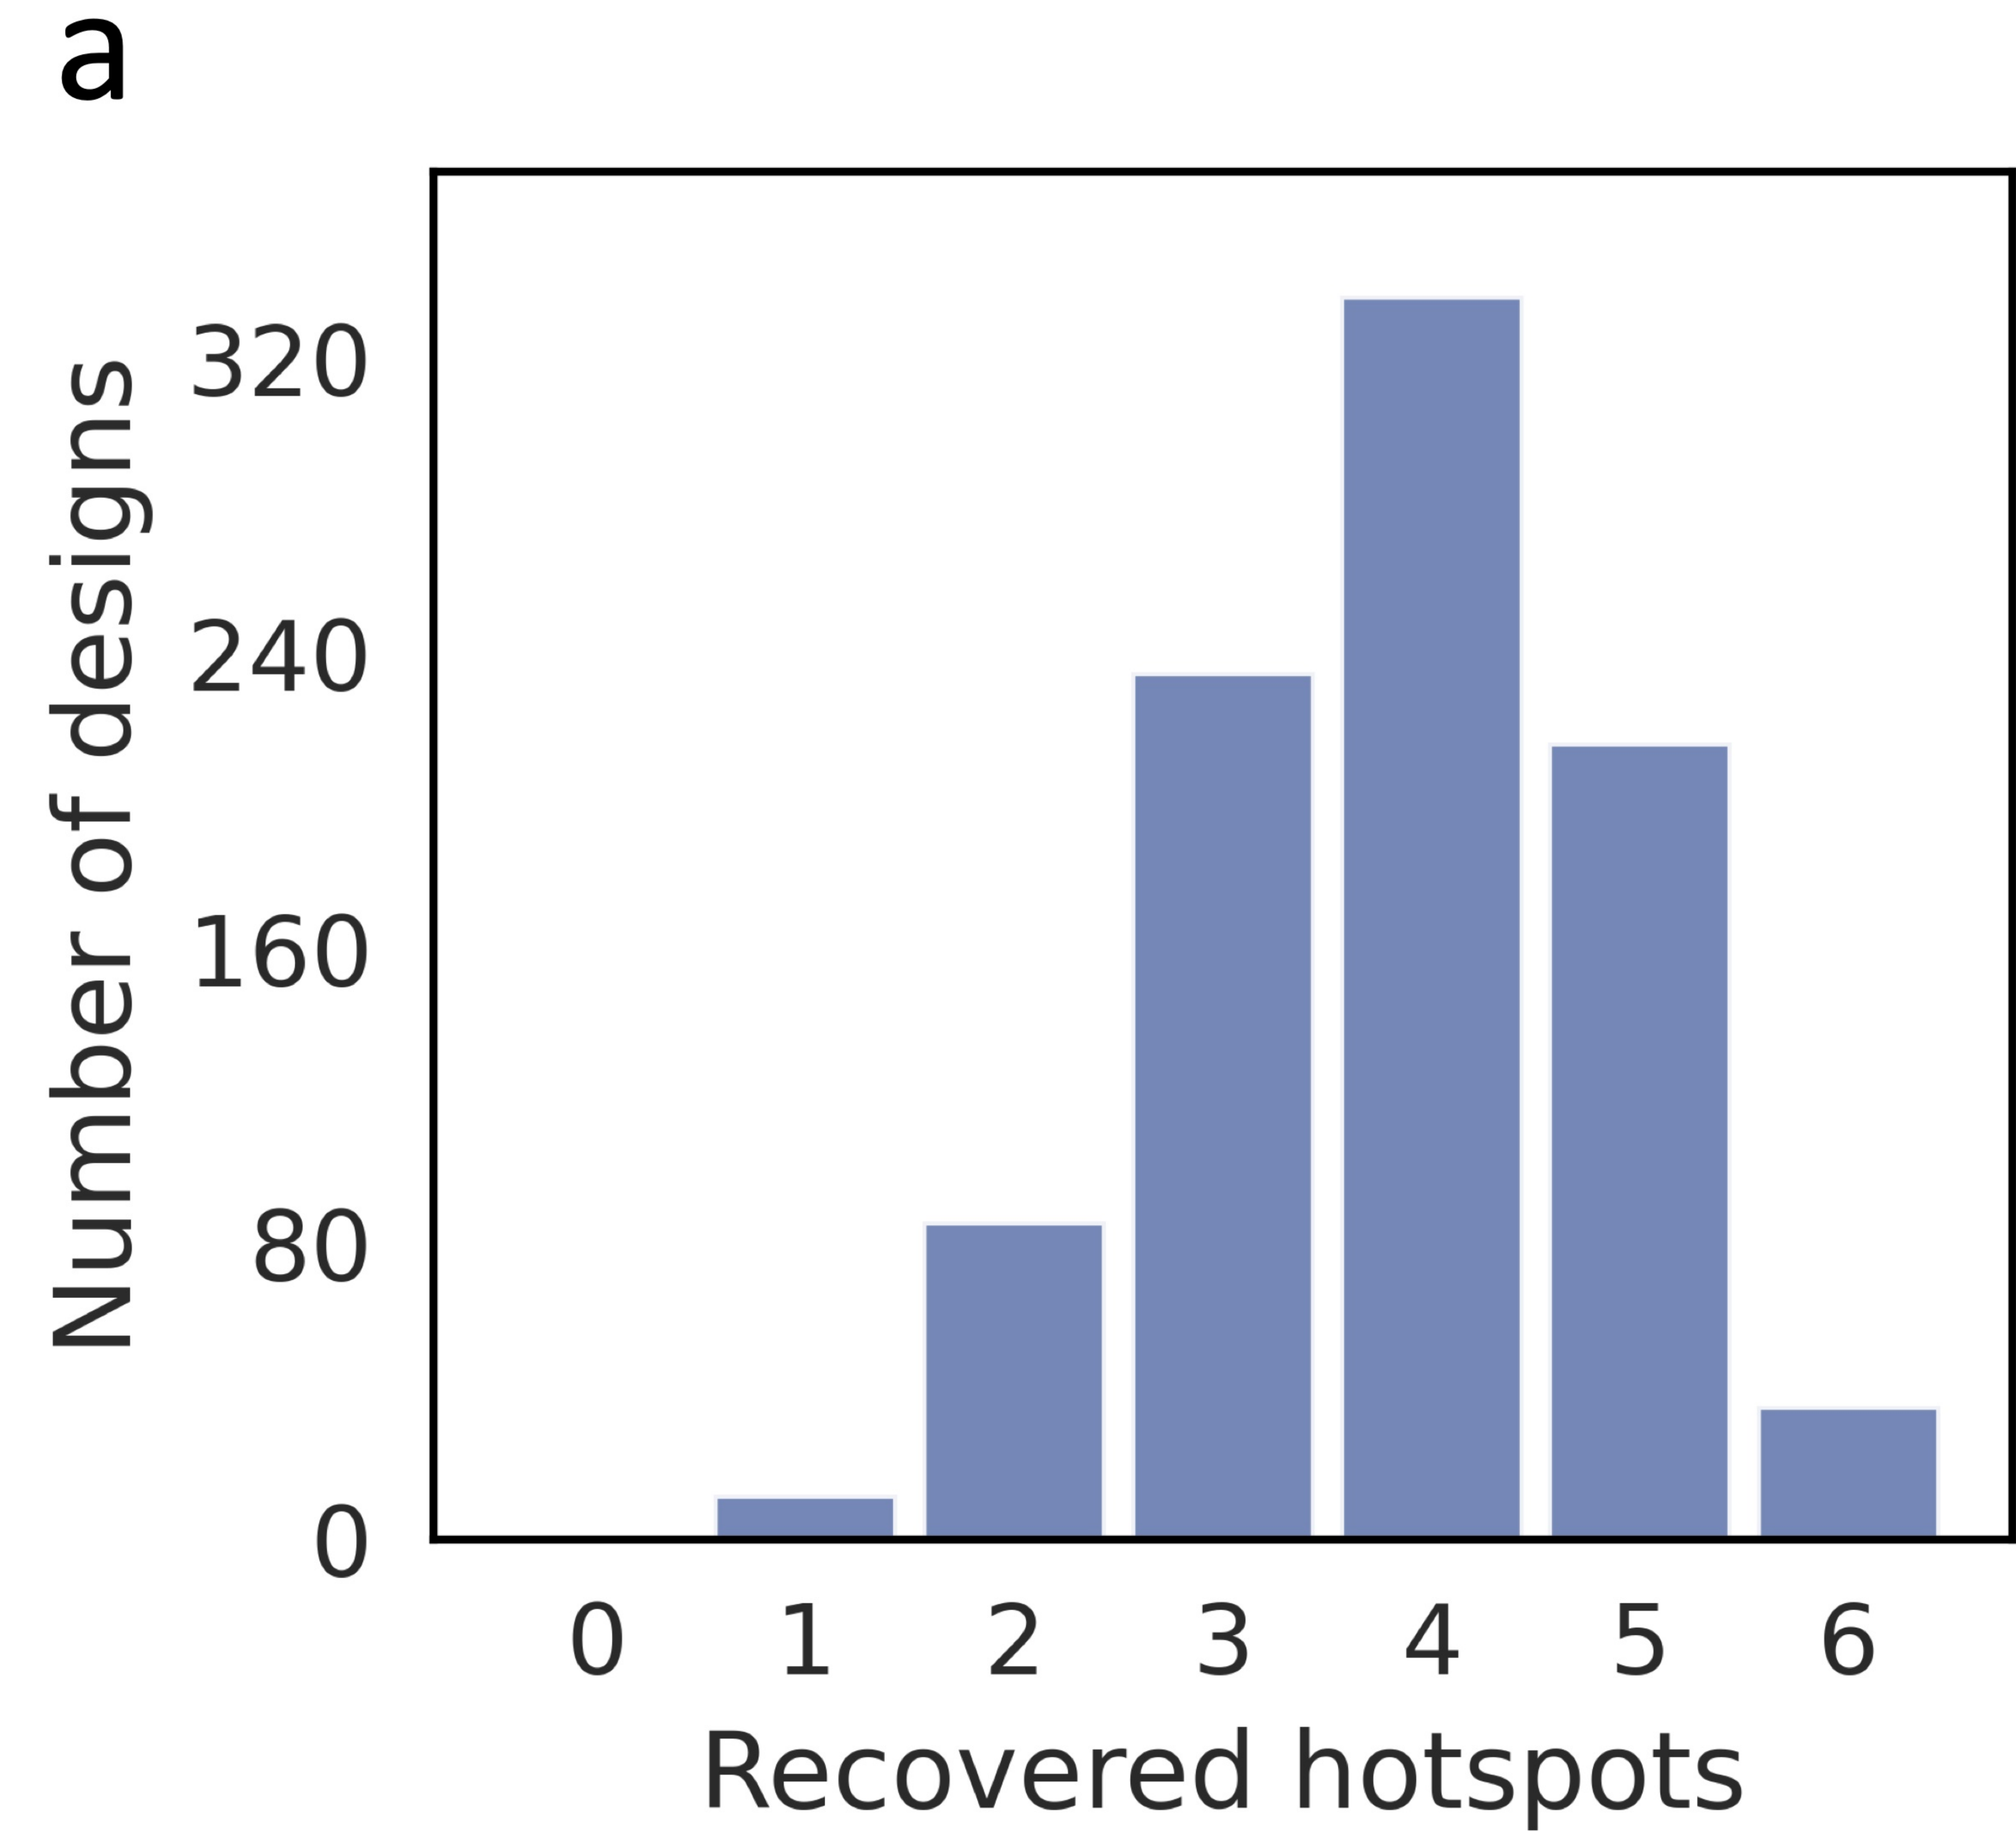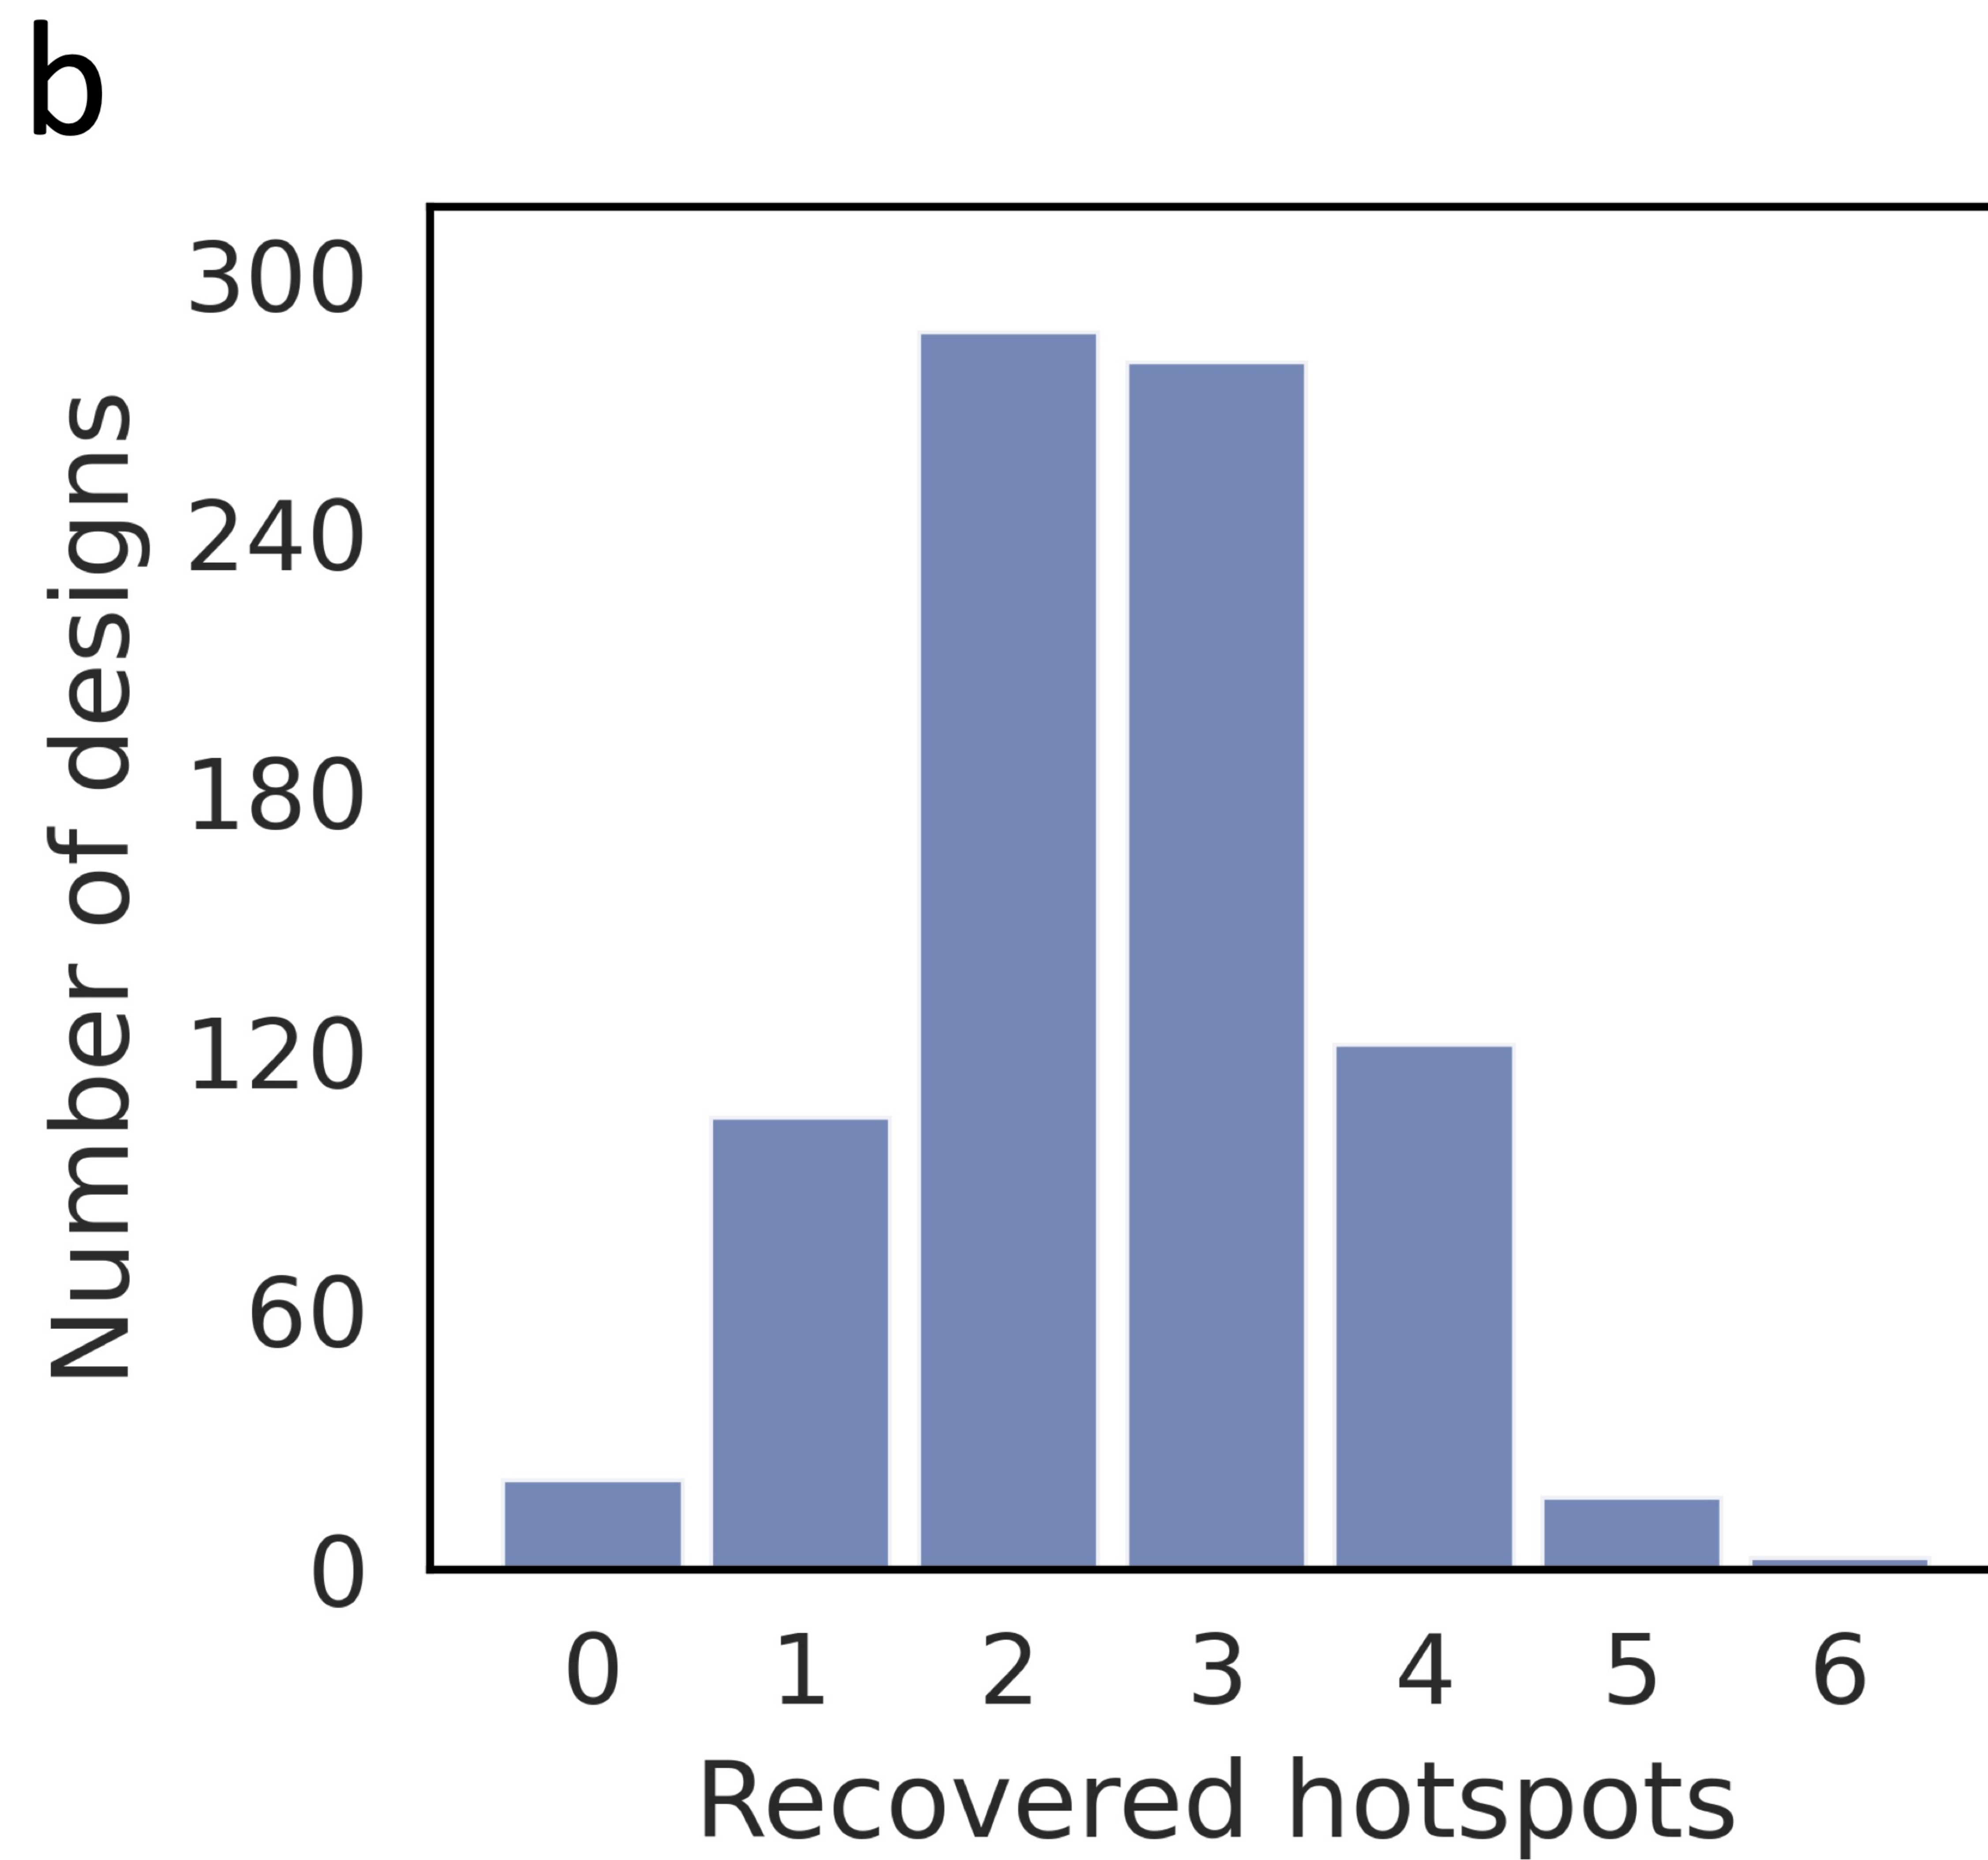

Supplement: d6sc01722c2.pdf [file d6sc01722c2.pdf]

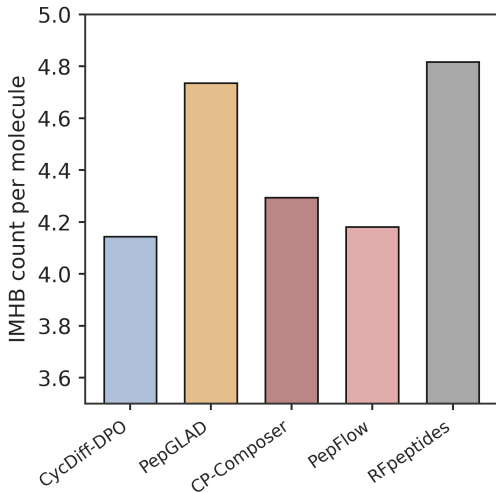

Supplement: d6sc01722c4.pdf [file d6sc01722c4.pdf]

**a**

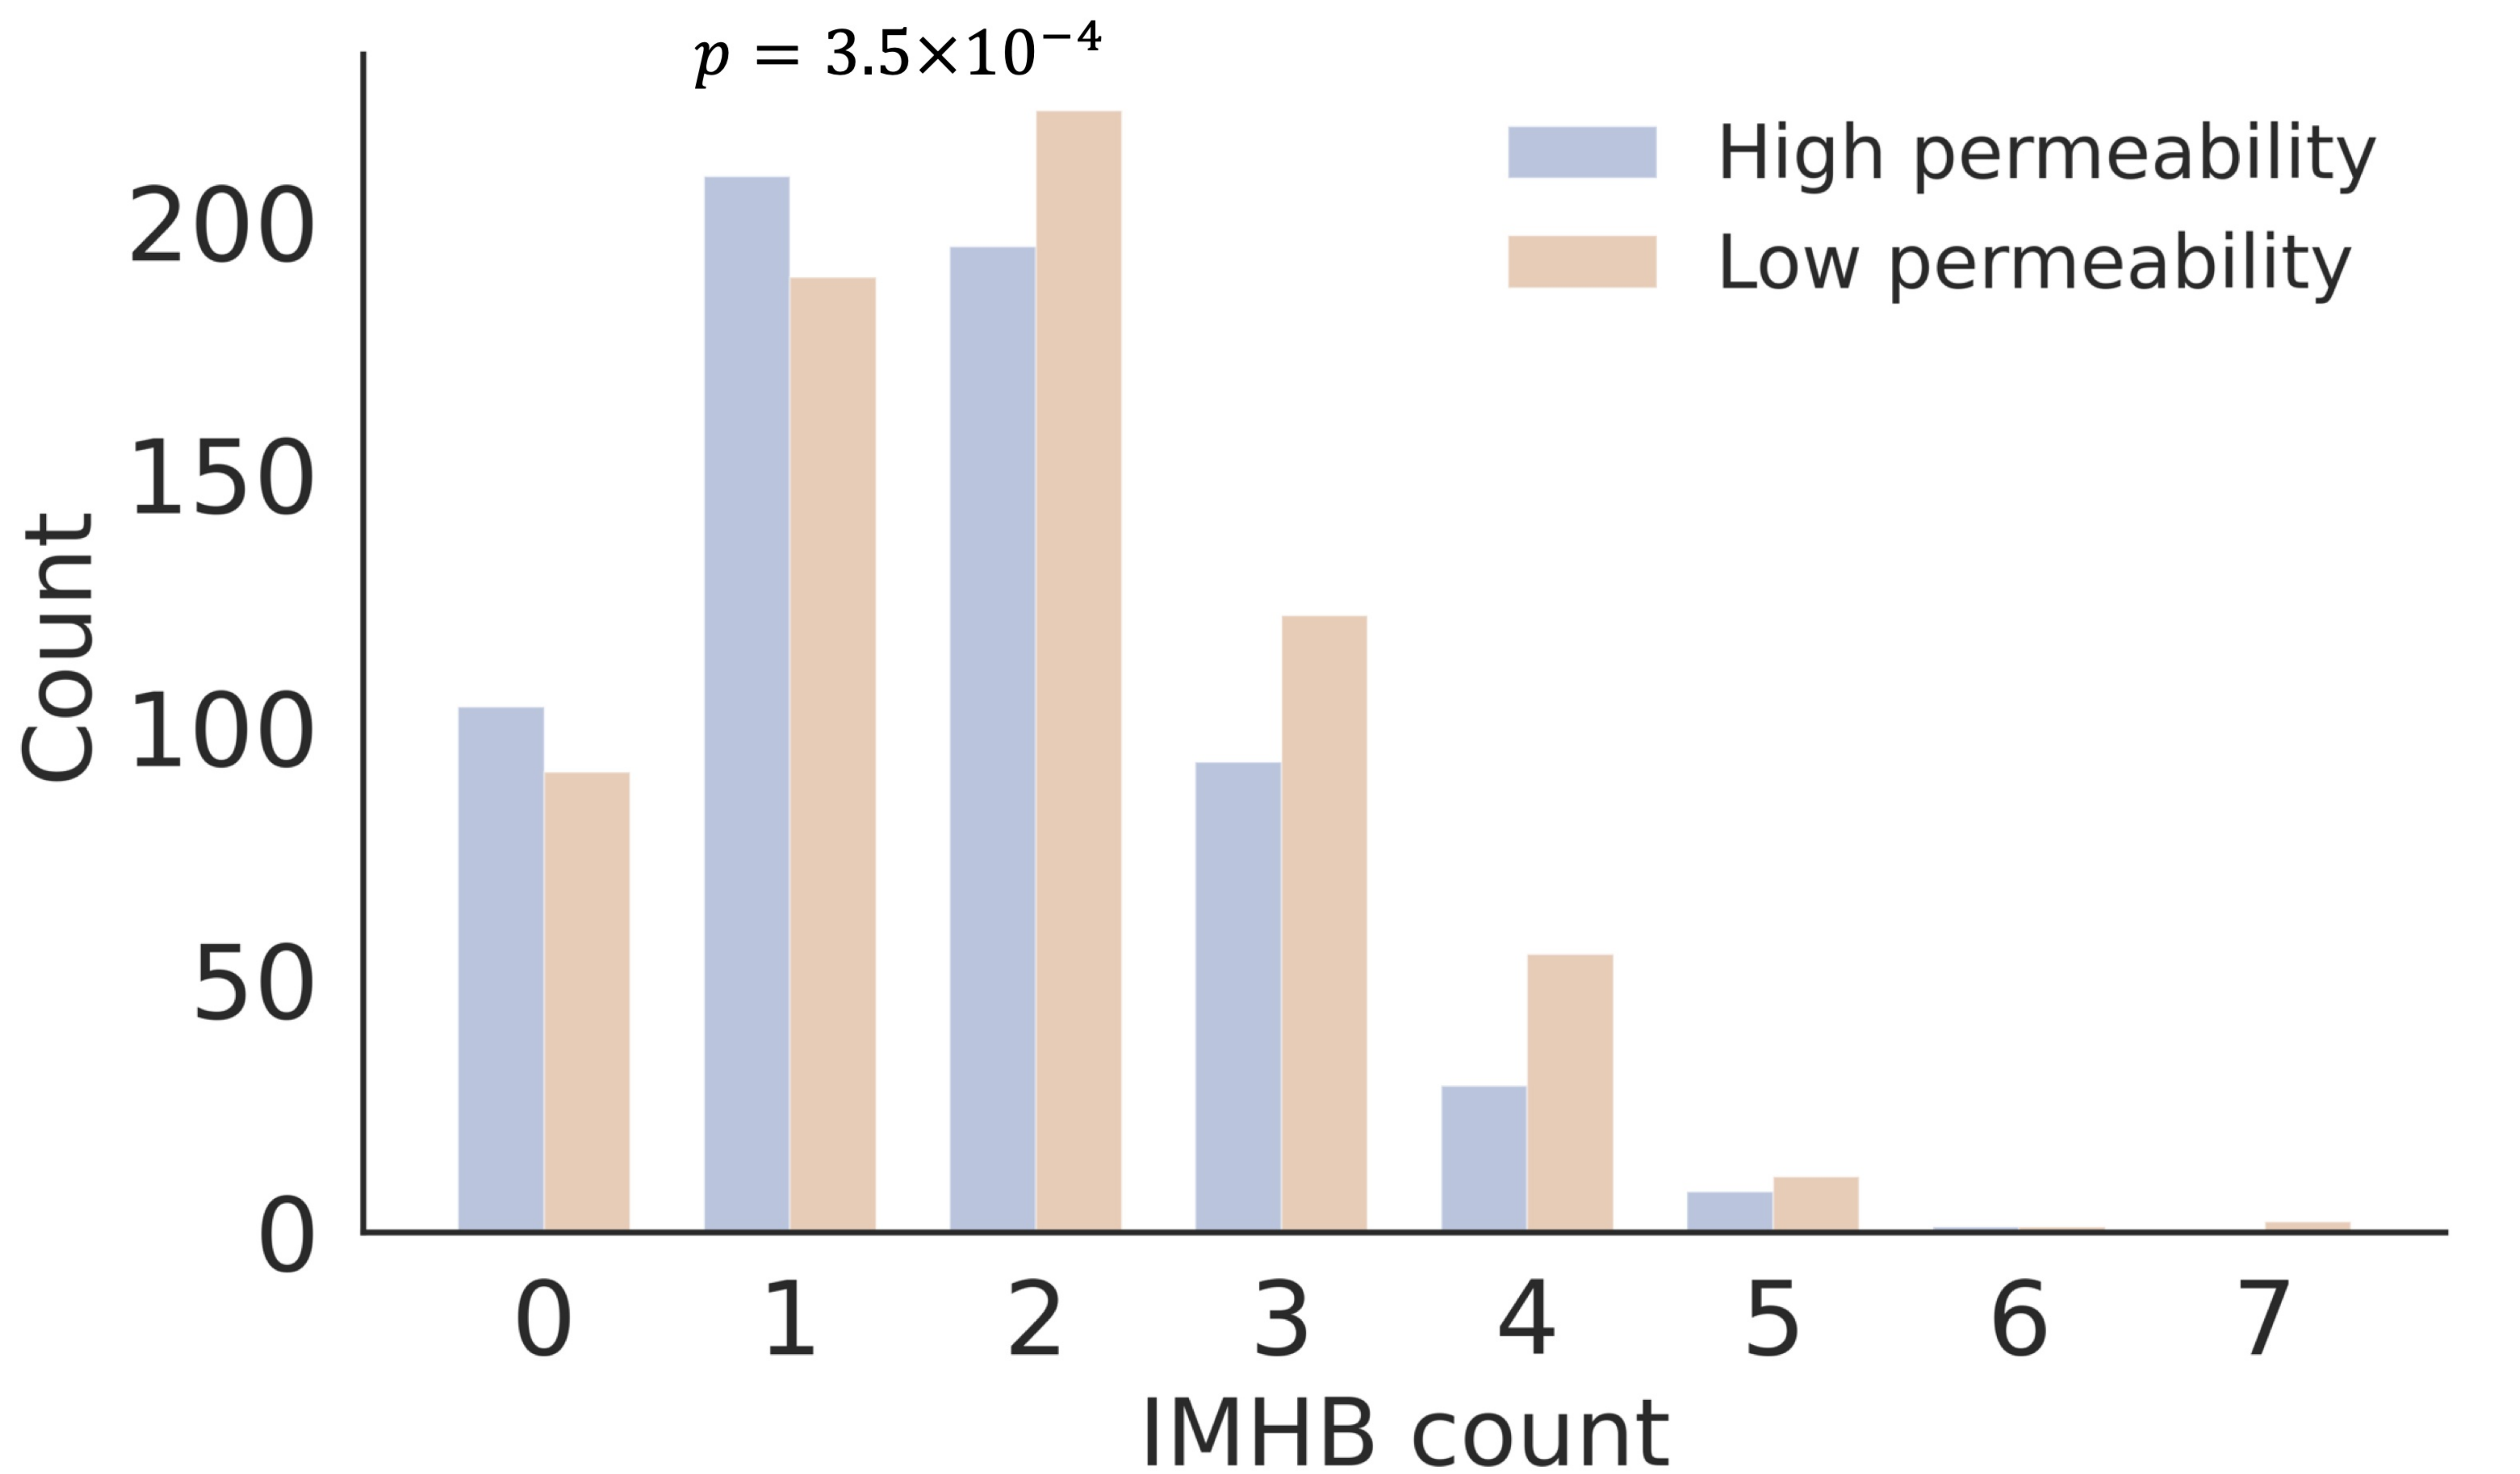

**b**

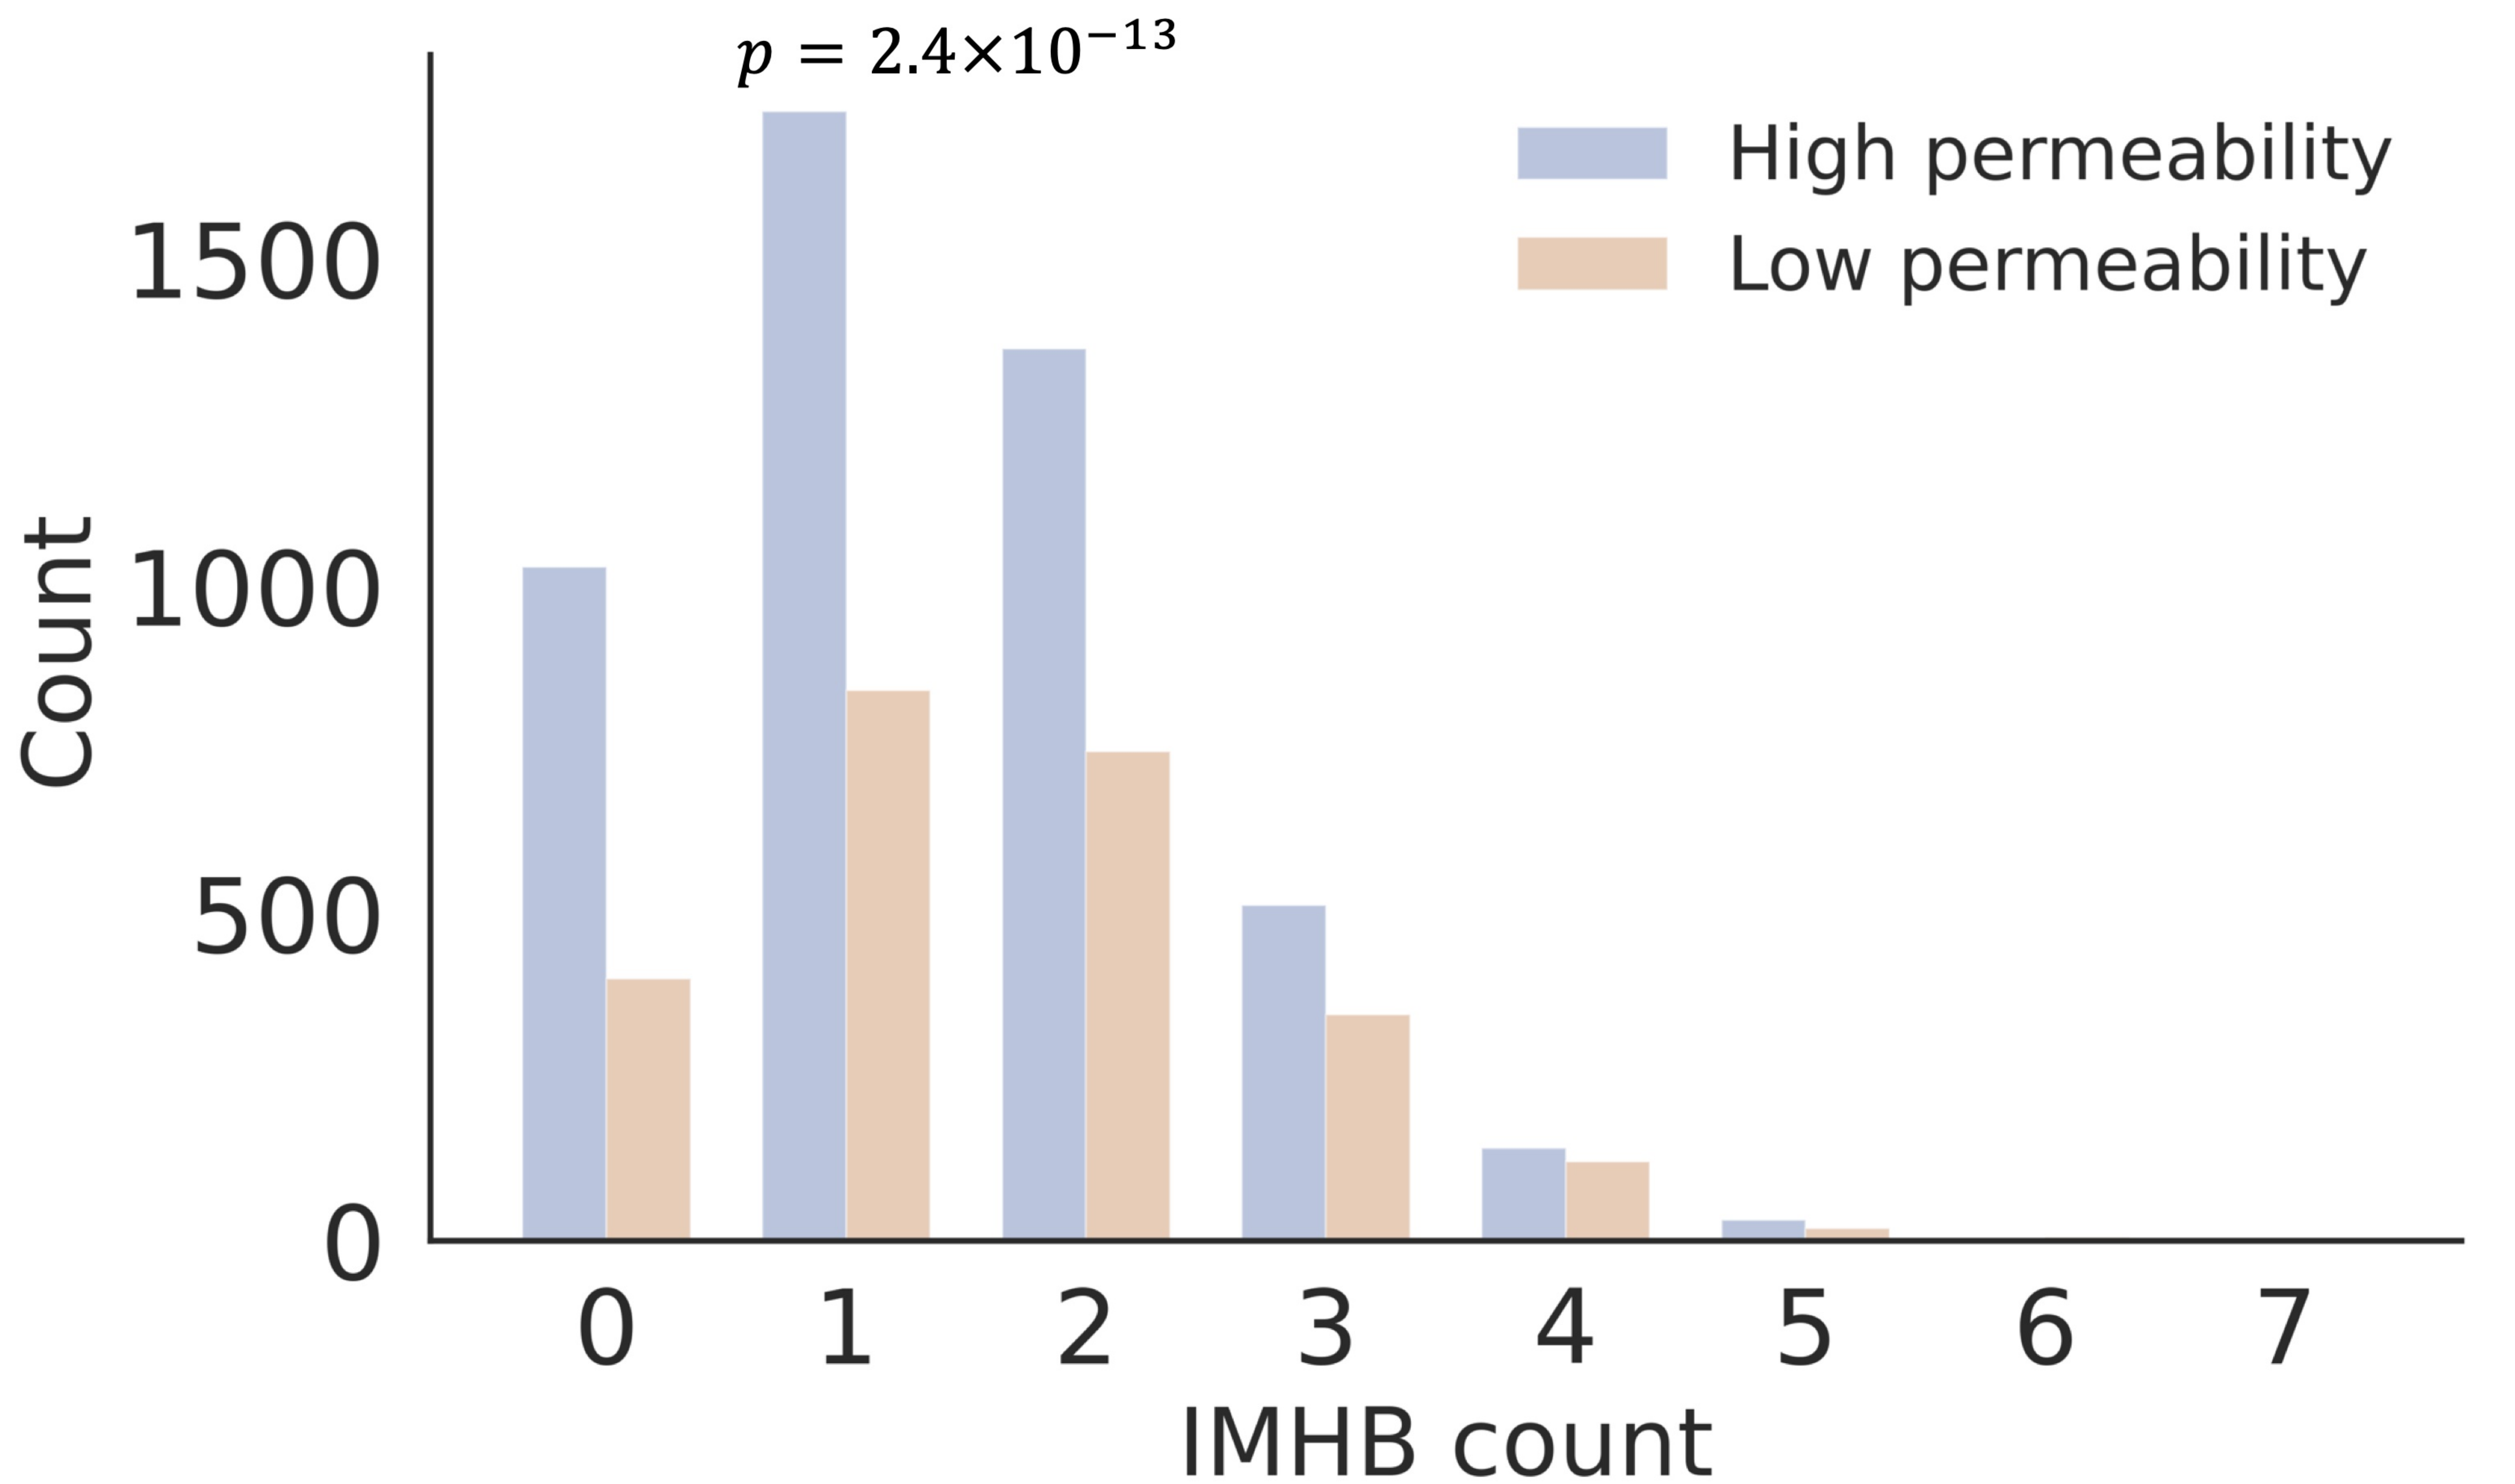

Supplement: d6sc01722c5.pdf [file d6sc01722c5.pdf]

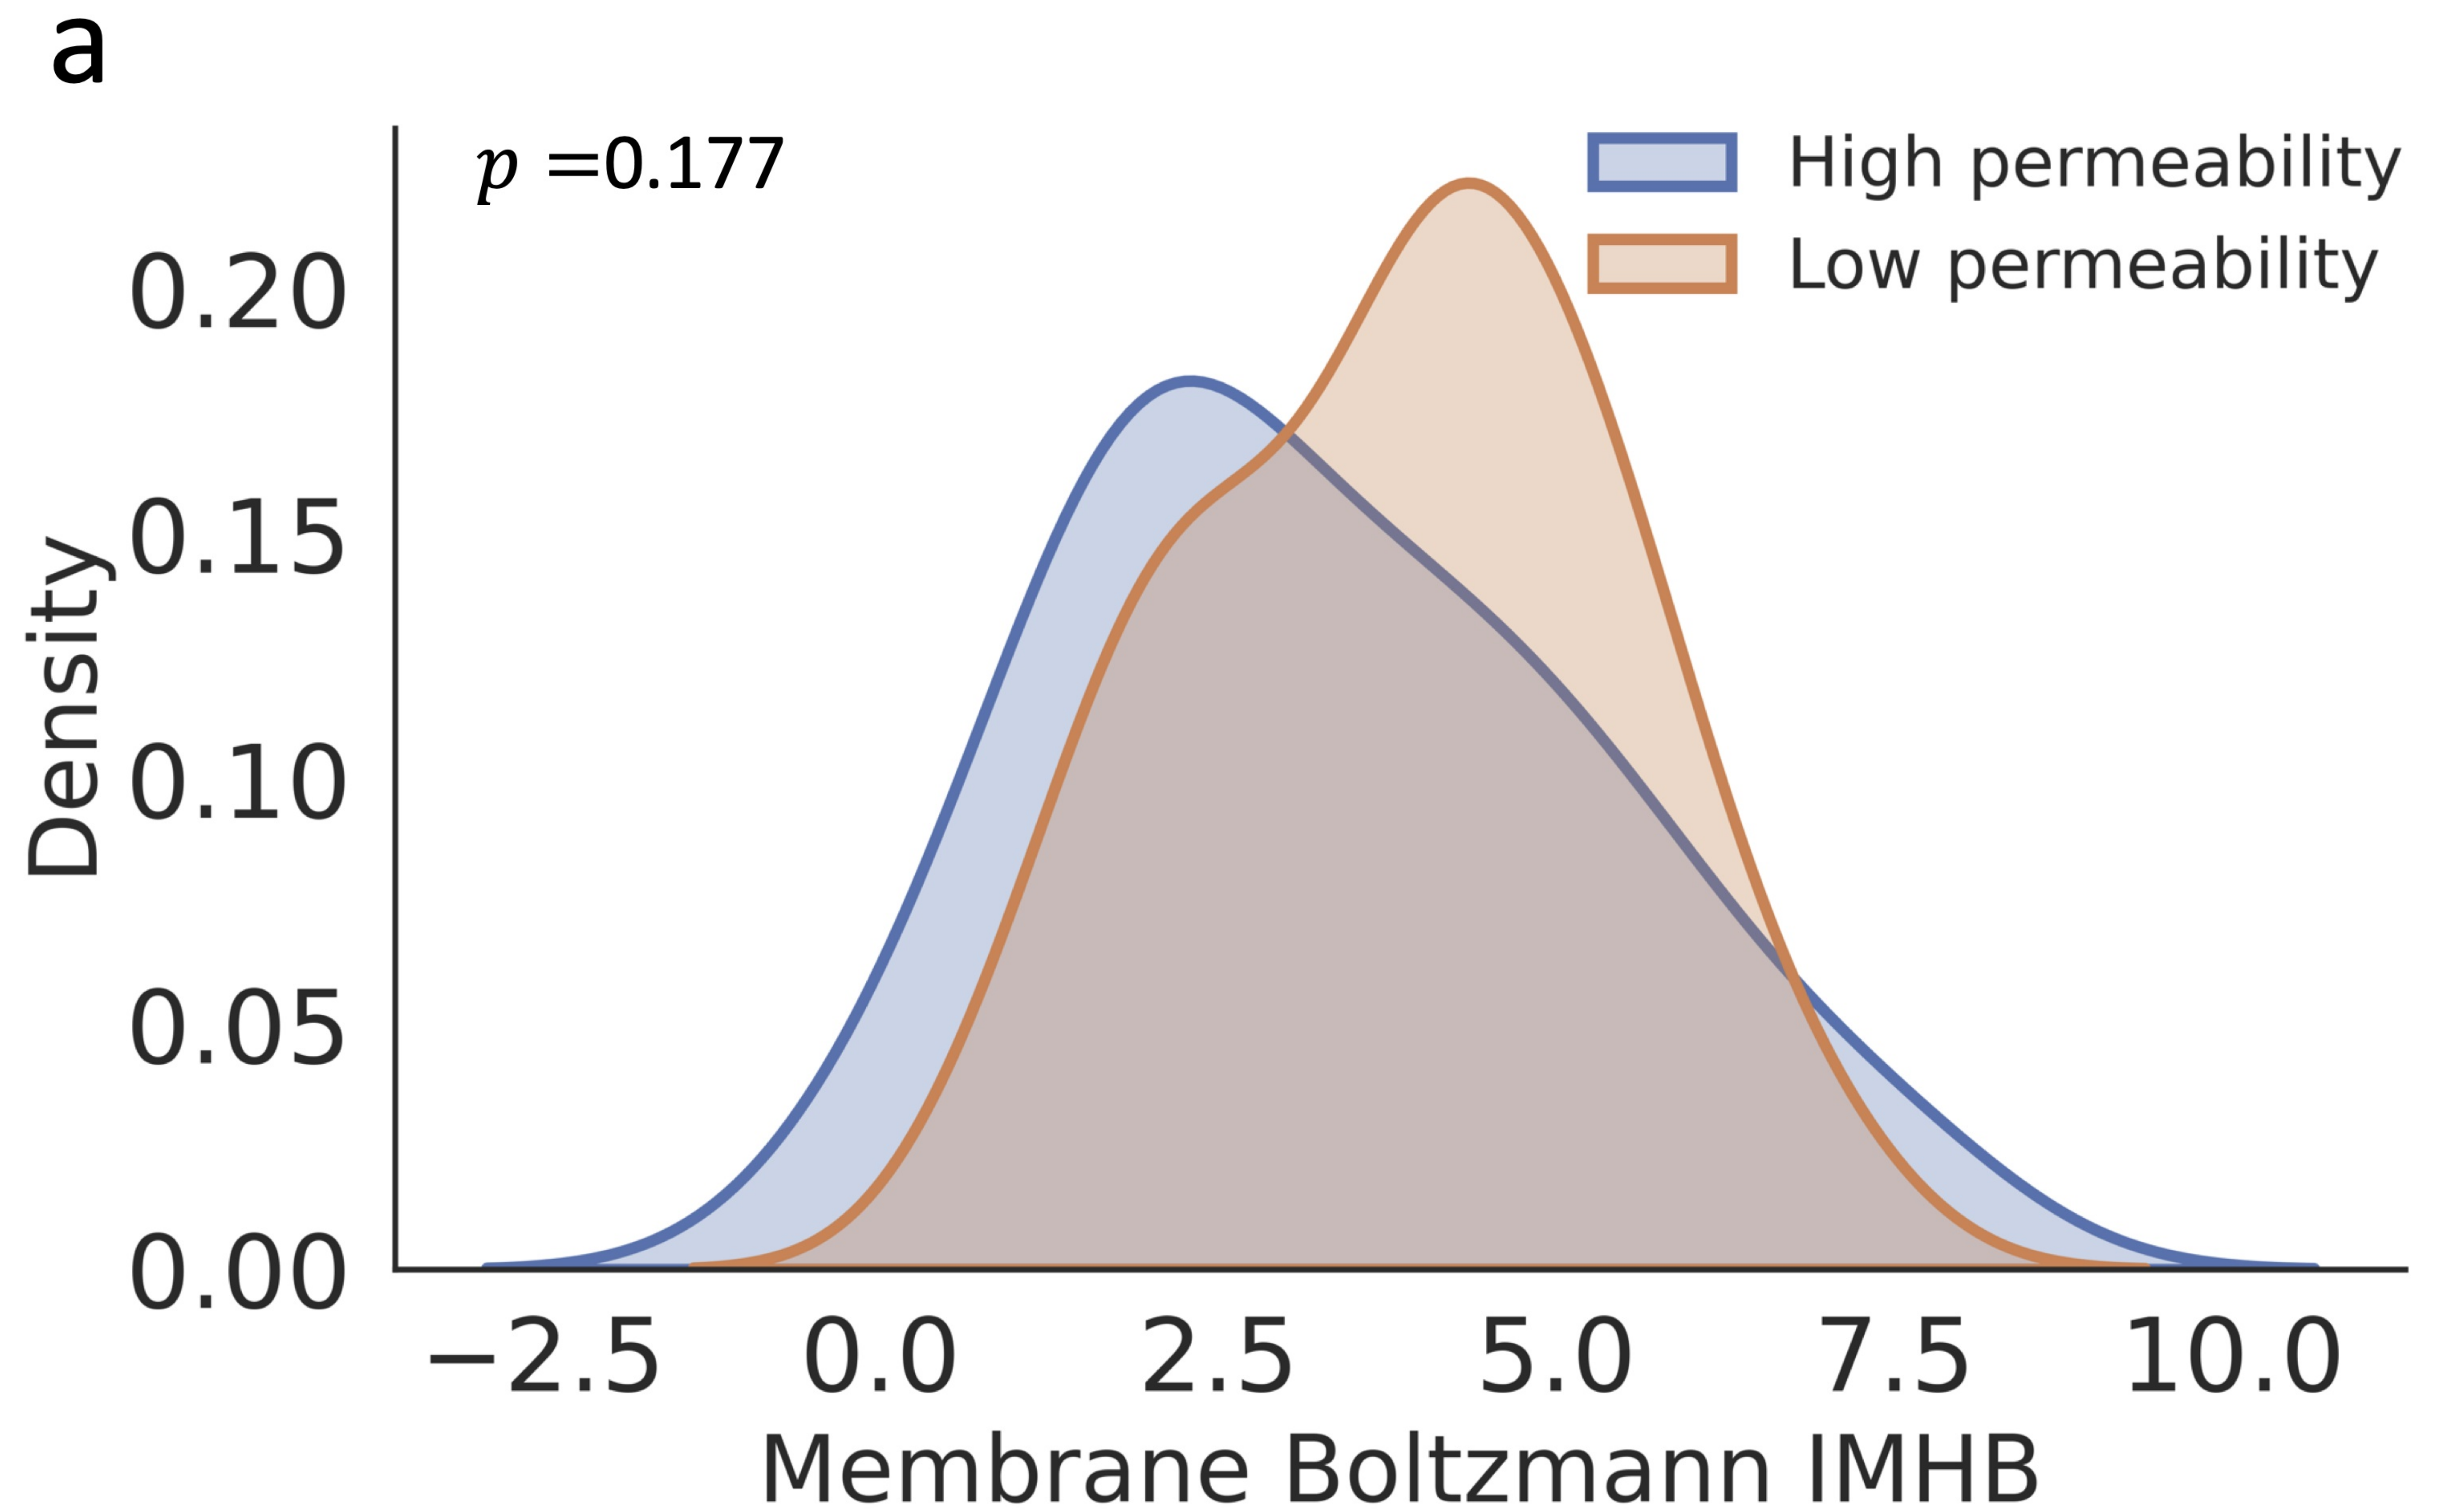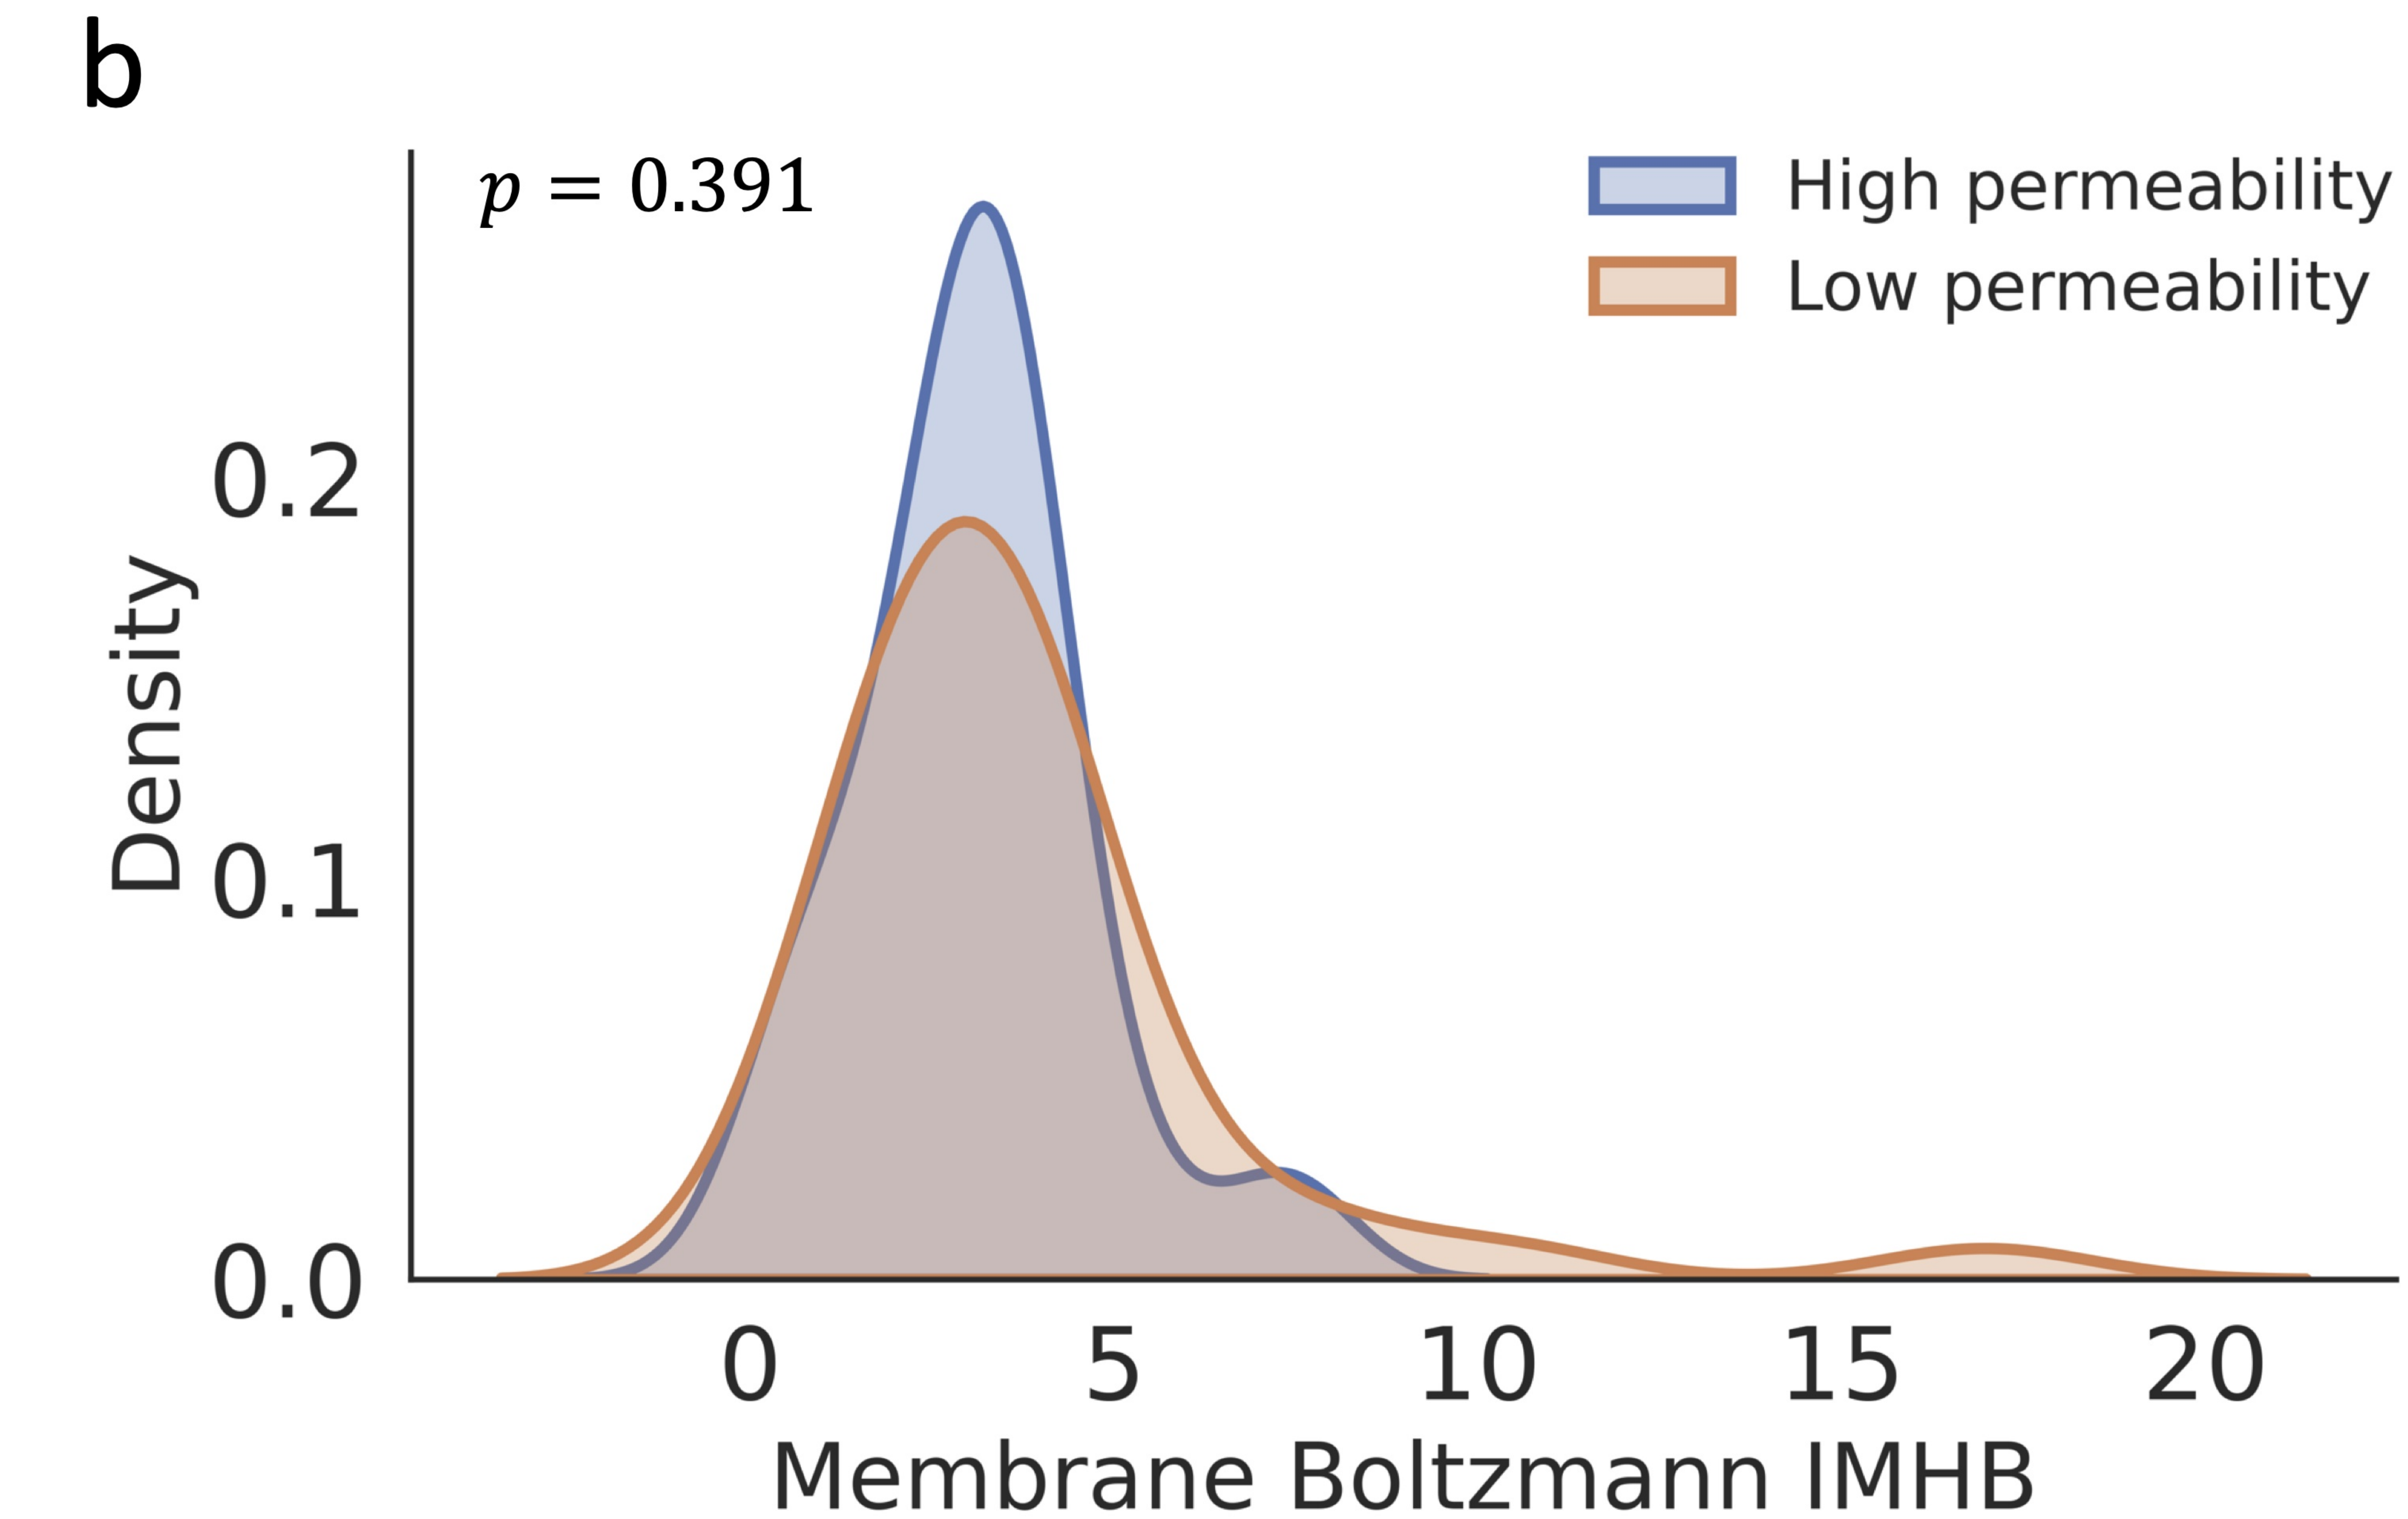

Supplement: d6sc01722c6.pdf [file d6sc01722c6.pdf]
